# Supplementary material for: Saccharomyces cerevisiae DNA Ligase IV Supports Imprecise End Joining Independently of Its Catalytic Activity
Source: PLOS journal article supplement (doi:10.1371/journal.pgen.1003599), 2013-06-27

Figure S2

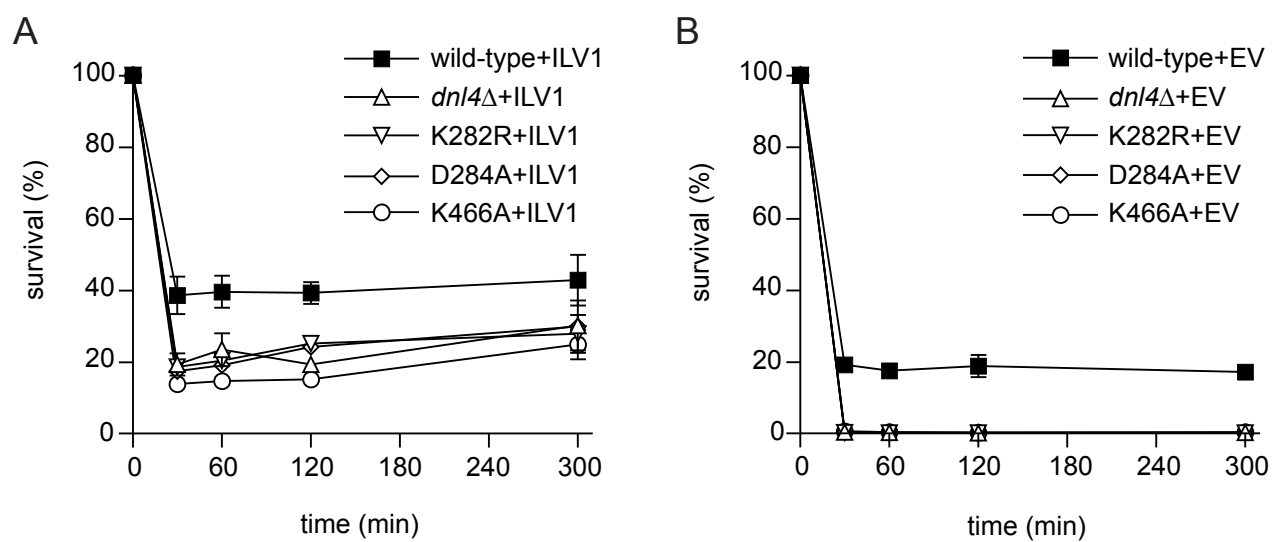

Supplement: S2 (10.1371/journal.pgen.1003599.s002) [file journal.pgen.1003599.s002]
